# Supplementary material for: Antibody-Conjugated Electrospun Nanofibers for Electrochemical Detection of Methamphetamine
Source: PubMed Central journal article supplement (PMC10214377; doi:10.1021/acsami.3c02266), 2023-05-15
Supplement: am3c02266_si_001.pdf [file am3c02266_si_001.pdf]

## Supporting Information

### Antibody-conjugated electrospun nanofibers for electrochemical detection of methamphetamine

Gozde Atik, Nur Melis Kiliç, Nesrin Horzum\*, Dilek Odaci\* and Suna Timur\*

\*Prof. Dr. Suna Timur, Ege University Faculty of Science Biochemistry Department;

[suna.timur@ege.edu.tr](mailto:suna.timur@ege.edu.tr), [sunatimur@yahoo.com](mailto:sunatimur@yahoo.com)

\*Prof. Dr. Dilek Odaci, Ege University Faculty of Science Biochemistry Department;

[dilek.odaci.demirkol@ege.edu.tr](mailto:dilek.odaci.demirkol@ege.edu.tr), [dilekodaci.od@gmail.com](mailto:dilekodaci.od@gmail.com)

\*Assoc. of Prof. Dr. Nesrin Horzum, İzmir Katip Çelebi University Department of Engineering

Sciences; [nesrin.horzum.polat@ikcu.edu.tr](mailto:nesrin.horzum.polat@ikcu.edu.tr), [n.horzum@gmail.com](mailto:n.horzum@gmail.com)

**Table S1.** Preparation conditions of PVDF-PEI electrospun nanofibers using various concentrations of PVDF and PEI solutions.

| PVDF (%) | Solvents for PVDF | PEI (%) | Solvent for PEI | Ratio of PVDF:PEI (v:v) | Parameters for electrospinning (Applied potential; Flow rate; Distance from needle to target) |
|----------|-------------------|---------|-----------------|-------------------------|-----------------------------------------------------------------------------------------------|
| 10       | DMF:Ac (2:8; v:v) | 10      | DMF             | 9:1                     | 15 kV; 1.8 mL/h; 12 cm                                                                        |
| 10       | DMF:Ac (2:8; v:v) | 15      | DMF             | 9:1                     | 16 kV; 1.8 mL/h; 13 cm                                                                        |
| 15       | DMF:Ac (2:8; v:v) | 10      | DMF             | 9:1                     | 18 kV; 2.0 mL/h; 12 cm                                                                        |
| 15       | DMF:Ac (2:8; v:v) | 15      | DMF             | 9:1                     | 18 kV; 2.0 mL/h; 12 cm                                                                        |
| 15       | DMF:Ac (2:8; v:v) | 20      | DMF             | 9:1                     | 17 kV; 2.0 mL/h; 15 cm                                                                        |
| 20       | DMF:Ac (2:8; v:v) | 15      | DMF             | 9:1                     | 17 kV; 2.0 mL/h; 15 cm                                                                        |
| 20       | DMF:Ac (2:8; v:v) | 20      | DMF             | 9:1                     | 16 kV; 2.0 mL/h; 13 cm                                                                        |
